# Supplementary material
Source: Royal Society of Chemistry journal article supplement (https://www.rsc.org/suppdata/dt/1998/2651/f803028b.pdf)

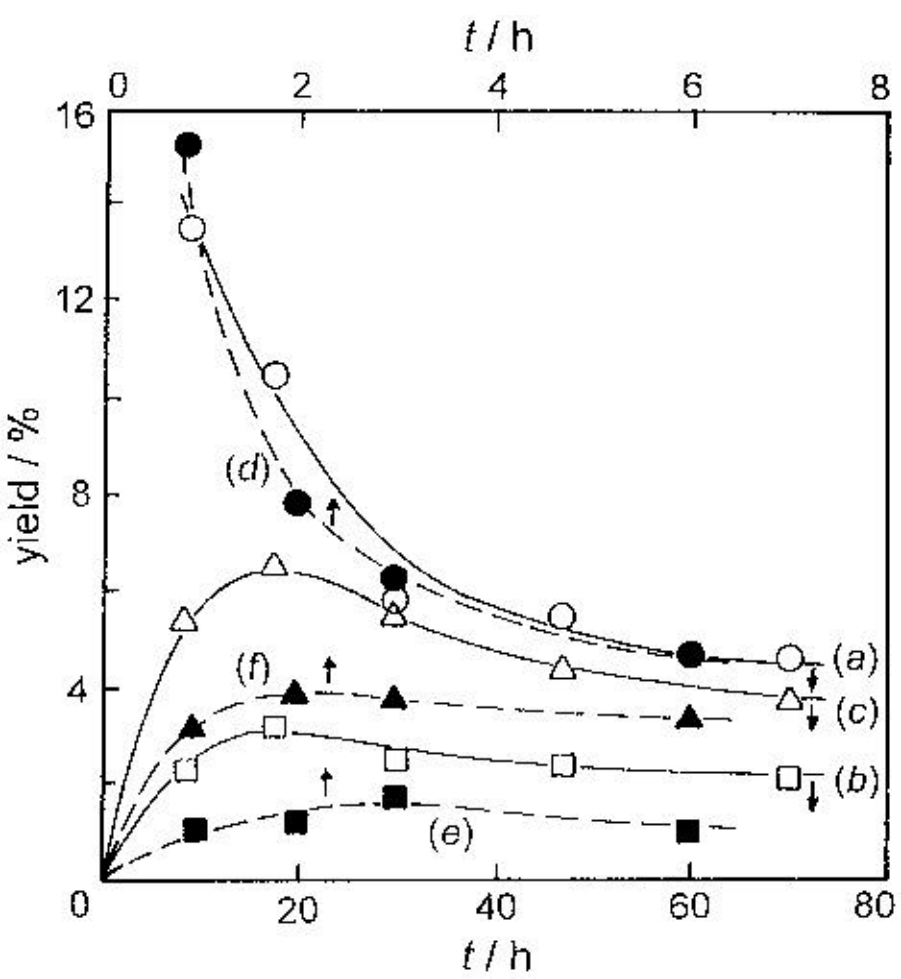

Supplement: Supplementary file 1 [file f803028b.pdf]
